# Supplementary material
Source: HighWire-hosted journal article supplement (https://jitc.bmj.com/content/12/10/e010148)
Supplement: inline-supplementary-material-2 [file inline-supplementary-material-2.pdf]

## Targeting CD93 on Monocytes revitalizes Anti-Tumor Immunity by Enhancing the Function and Infiltration of CD8<sup>+</sup> T Cells

Da Jiang<sup>1,2,#</sup>, Ai-Qi Huang<sup>1,#</sup>, Bai-Xi Zhu<sup>1</sup>, Jiang-Ling Gong<sup>1</sup>, Yong-Hao Ruan<sup>1</sup>,  
Xing-Chen Liu<sup>1</sup>, Limin Zheng<sup>1,2,\*</sup>, Yan Wu<sup>1,\*</sup>

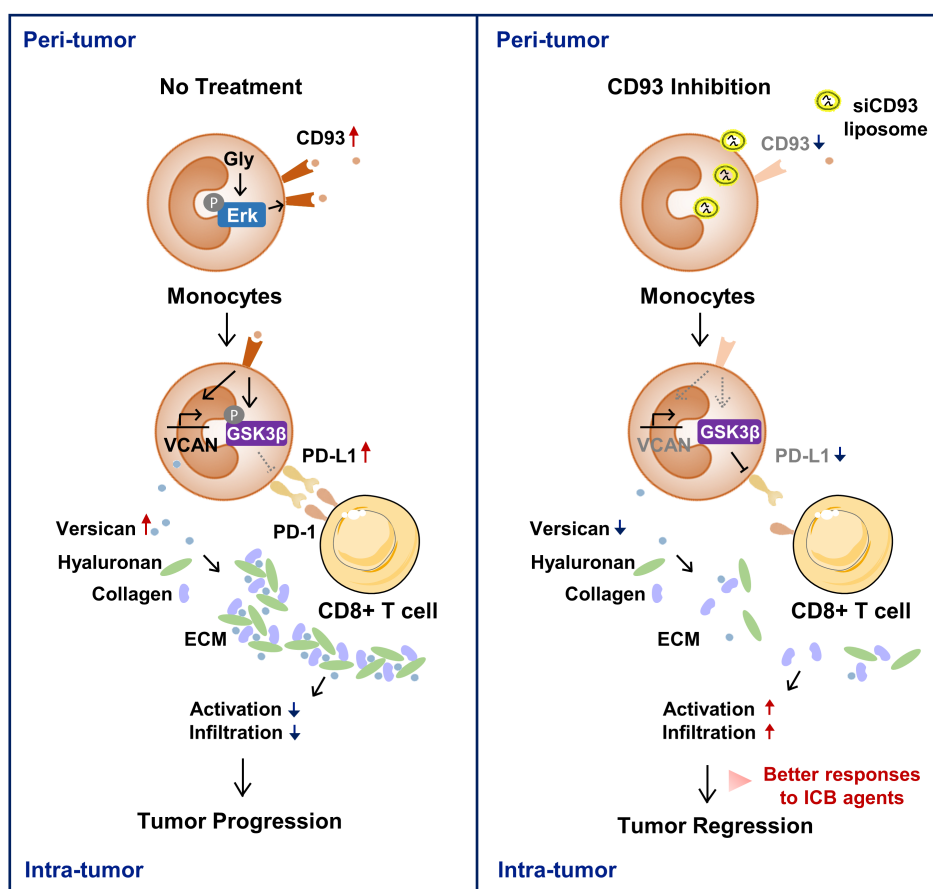

### Highlights

- Glycolytic switch induces CD93 expression on peri-tumoral monocytes in HCC
- CD93 increases PD-L1 stability and up-regulates versican production to re-modulate ECM
- Inhibition of CD93 on monocytes enhances the activation and tumor infiltration of CD8<sup>+</sup> T cell
